# Supplementary material for: Ustilaginaceae Biocatalyst for Co-Metabolism of CO2-Derived Substrates toward Carbon-Neutral Itaconate Production
Source: PubMed Central journal article supplement (PMC7911105; doi:10.3390/jof7020098), 2021-01-29
Supplement: jof-07-00098-s001.pdf [file jof-07-00098-s001.pdf]

## Supplementary materials

### Supplementary figures

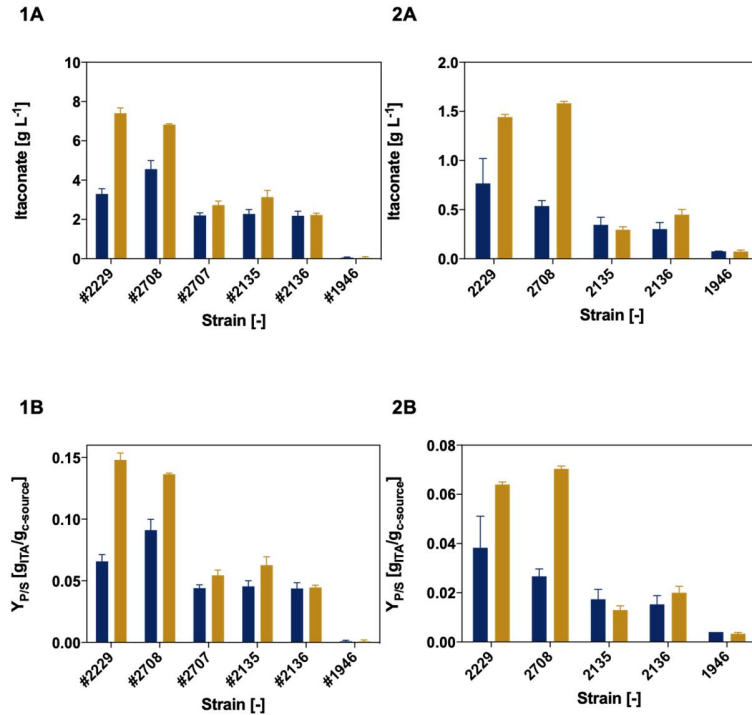

**Figure S1 Itaconic acid production of most promising Ustilaginaceae strains using different carbon source concentrations.** (A) Maximum itaconic acid production [g L<sup>-1</sup>] and (B) Y<sub>P/S</sub> [g<sub>ITA</sub>/g<sub>C-source</sub>] during System Duetz® 24-deep well plates cultivation experiments with 1.5 ml MTM medium and 0.8 g L<sup>-1</sup> NH<sub>4</sub>Cl. Cultivations were performed with two different carbon-source concentrations (1) 50 g L<sup>-1</sup> glucose + 6.25 g L<sup>-1</sup> acetate and (2) 20 g L<sup>-1</sup> glucose + 2.5 g L<sup>-1</sup> acetate. Ustilaginaceae candidates using acetate as a co-substrate are shown in orange, respective glucose references are shown in blue. Error bars indicate the deviation from the mean for n=2.

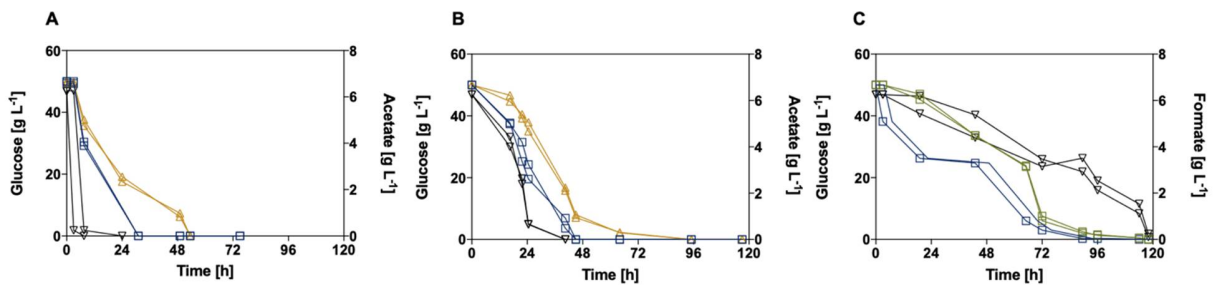

**Figure S2 C-source consumption during controlled batch fermentations of selected Ustilaginaceae candidates.** (A) *U. maydis* #2229, (B) *U. rabenhorstiana* #2708 and (C) *U. cynodontis* #2705 fermentation in a bioreactor containing MTM medium (0.8 g L<sup>-1</sup> NH<sub>4</sub>Cl, 30°C, 80% DOT, at pH 6.5). Glucose consumptions using acetate as a co-substrate are shown in orange, formate co-substrate cultivations are shown in green. Respective glucose references (50 g L<sup>-1</sup>) are shown in blue. Black indicates co-substrate consumption (6.25 g L<sup>-1</sup>).

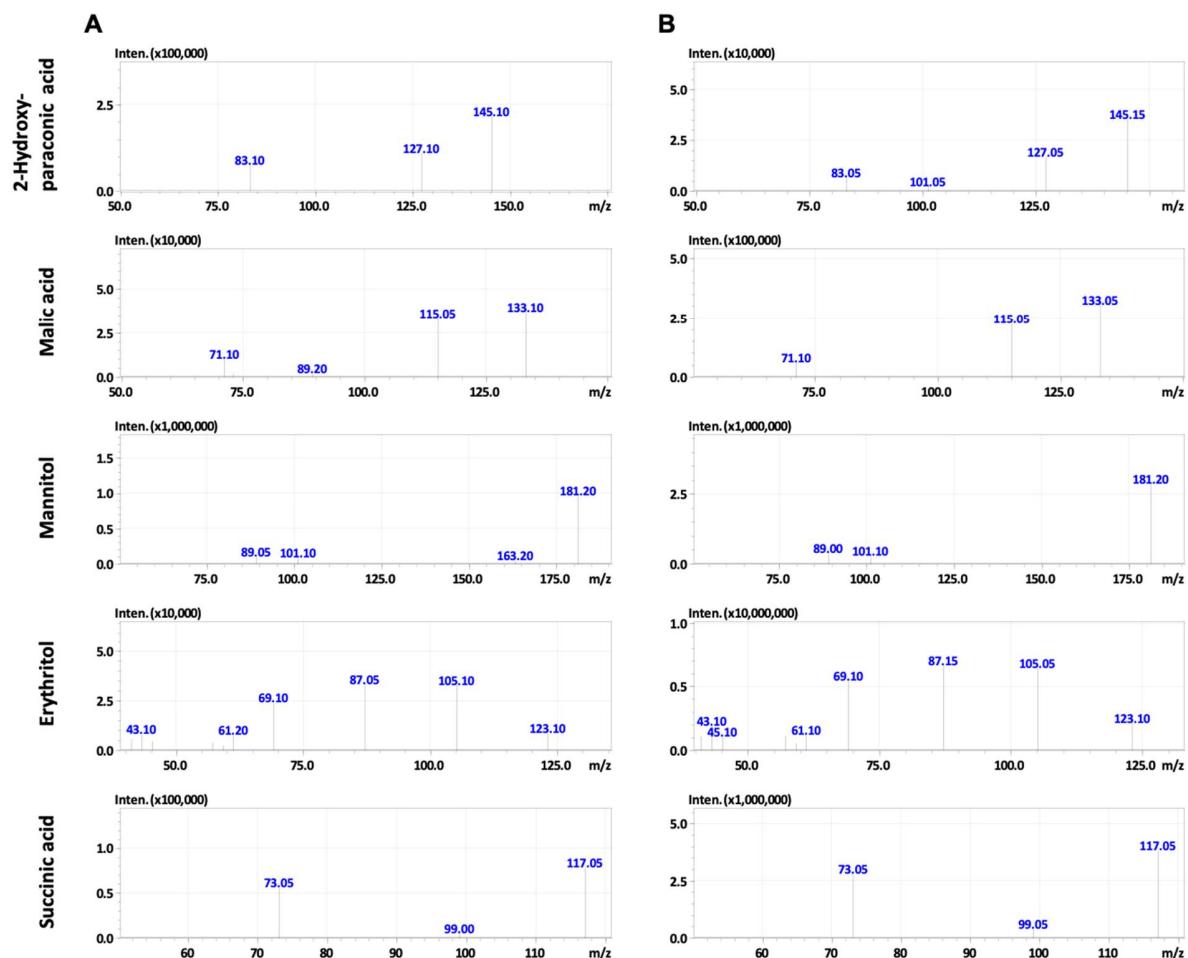

**Figure S3 Extracellular metabolite identification via LC-UV/RI-MS/MS.** (A) Product ion scan for extracellular metabolite samples and (B) their corresponding standards. Extracellular metabolites in the supernatant formed by *U. maydis* #2229, *U. rabeihorstiana* #2708, and *U. cynodontis* #2705. Samples were taken after 75, 64, and 114 h during fermentation in a bioreactor containing MTM medium (0.8 g L<sup>-1</sup> NH<sub>4</sub>Cl, 19.5 g L<sup>-1</sup> MES, 30°C, 80% DOT, at pH 6.5).

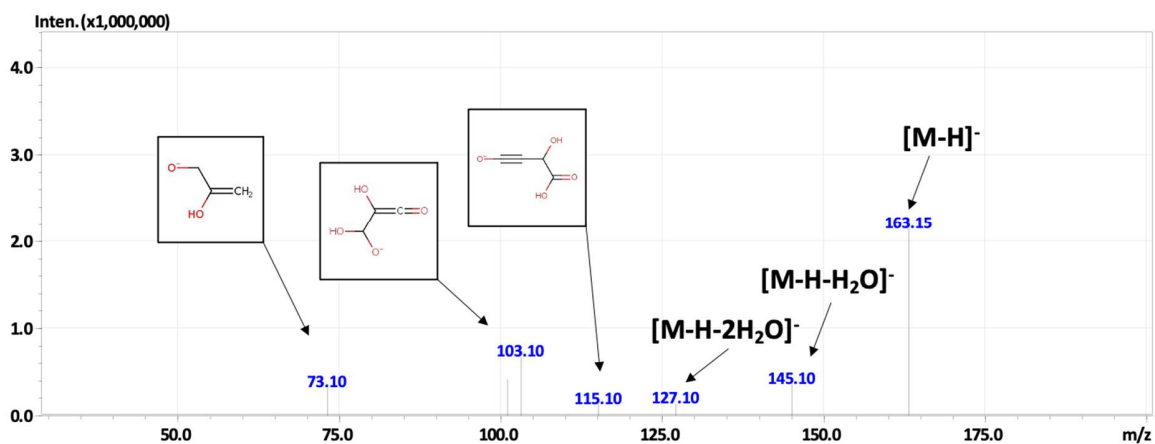

**Figure S4 MS/MS spectrum of ITT.** Structure prediction of itatartarate (ITT) was performed via CFM-ID 3.0 [1].

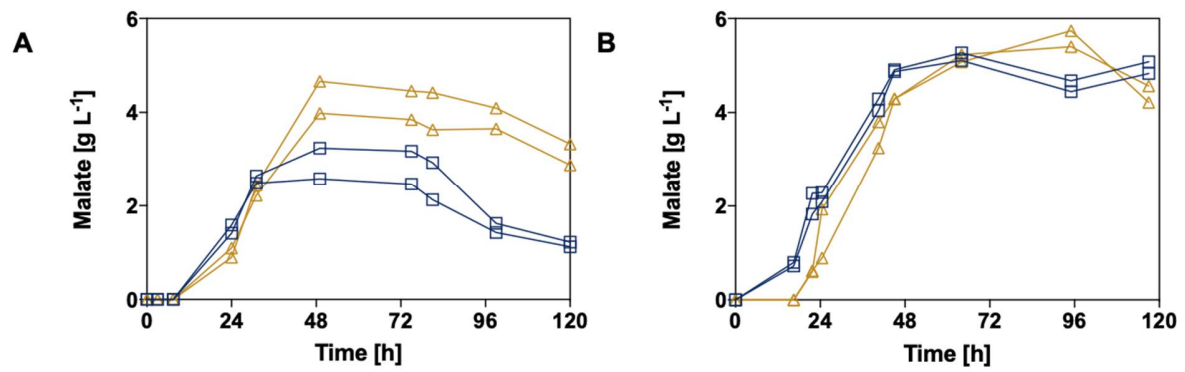

**Figure S5 Malate production during controlled batch fermentations of selected Ustilaginaceae candidates.** (A) *U. maydis* #2229 and (B) *U. rabenhorstiana* #2708 fermentation in a bioreactor containing MTM medium ( $0.8 \text{ g L}^{-1} \text{ NH}_4\text{Cl}$ ,  $30^\circ\text{C}$ , 80% DOT, at pH 6.5). Glucose consumptions using acetate as a co-substrate are shown in orange. Respective glucose references ( $50 \text{ g L}^{-1}$ ) are shown in blue. Black indicates co-substrate consumption ( $6.25 \text{ g L}^{-1}$ ).

## Supplementary tables

Table S1 Ustilaginaceae strains screened in this study.

| No.   | Strain                           | Origin                                            |
|-------|----------------------------------|---------------------------------------------------|
| #1946 | <i>Pseudozyma antartica</i>      | NRRL Y – 7808                                     |
| #1947 | <i>Pseudozyma antartica</i>      | NRRL Y - 8295                                     |
| #1949 | <i>Ustilago maydis</i>           | DSM 3121                                          |
| #1951 | <i>Ustilago maydis</i>           | DSM 14603                                         |
| #2134 | <i>Ustilago maydis</i>           | Nr. 196                                           |
| #2135 | <i>Ustilago maydis</i>           | Nr. 197                                           |
| #2136 | <i>Ustilago maydis</i>           | Nr. 198                                           |
| #2144 | <i>Ustilago maydis</i>           | Nr. 206                                           |
| #2152 | <i>Ustilago maydis</i>           | Nr. 215                                           |
| #2158 | <i>Ustilago maydis</i>           | Nr. 469                                           |
| #2162 | <i>Ustilago maydis</i>           | Nr. 474                                           |
| #2167 | <i>Ustilago maydis</i>           | Nr. 480                                           |
| #2169 | <i>Ustilago maydis</i>           | Nr. 482                                           |
| #2172 | <i>Ustilago maydis</i>           | Nr. 485                                           |
| #2177 | <i>Ustilago maydis</i>           | Nr. 491                                           |
| #2178 | <i>Ustilago maydis</i>           | Nr. 492                                           |
| #2179 | <i>Ustilago maydis</i>           | Nr. 495                                           |
| #2196 | <i>Ustilago maydis</i>           | FB1 Mating type a1b1                              |
| #2197 | <i>Ustilago maydis</i>           | FB2 Mating type a2b2                              |
| #2199 | <i>Ustilago maydis</i>           | RK 123                                            |
| #2205 | <i>Ustilago maydis</i>           | RK 212                                            |
| #2208 | <i>Ustilago maydis</i>           | RK215                                             |
| #2209 | <i>Macalpinomyces eriachnes</i>  | RK 028                                            |
| #2210 | <i>Sporisorium consanguineum</i> | RK 133                                            |
| #2211 | <i>Sporisorium cruentum</i>      | UMa920, Mating type MAT1                          |
| #2212 | <i>Sporisorium exsertum</i>      | RK 033                                            |
| #2213 | <i>Sporisorium scitamineum</i>   | UMa698, Sscl4, JS109, RK 109,<br>Mating type MAT1 |

Prof. M. Bölker,  
Philipps University  
Marburg, Germany

Banuett & Herskowitz,  
1989, Minnesoty USA

Ronny Kellner [2]

CBS 131454

CBS 131454

CBS 131456

CBS 133249

CBS 131457

|       |                                      |              |             |
|-------|--------------------------------------|--------------|-------------|
| #2214 | <i>Sporisorium walkeri</i>           | RK 031       | CBS 131462  |
| #2215 | <i>Ustanciosporium gigantosporum</i> | UMa706       | CBS 131464  |
| #2218 | <i>Ustilago filiformis</i>           | UMa701       | CBS 131469  |
| #2219 | <i>Ustilago trichophora</i>          | RK 089       | CBS 131473  |
| #2220 | <i>Ustilago vetiveriae</i>           | RK 075       | CBS 131474  |
| #2221 | <i>Ustilago xerochloae</i>           | UMa702       | CBS 131476  |
| #2229 | <i>Ustilago maydis</i>               | MB215        | DSM 17144   |
| #2696 | <i>Pseudozyma hubeiensis</i>         |              | NBRC 105053 |
| #2697 | <i>Pseudozyma hubeiensis</i>         |              | NBRC 105054 |
| #2698 | <i>Pseudozyma hubeiensis</i>         |              | NBRC 105055 |
| #2699 | <i>Ustilago trichophora</i>          |              | NBRC 100155 |
| #2700 | <i>Ustilago trichophora</i>          |              | NBRC 100156 |
| #2701 | <i>Ustilago trichophora</i>          |              | NBRC 100157 |
| #2702 | <i>Ustilago trichophora</i>          |              | NBRC 100158 |
| #2703 | <i>Ustilago trichophora</i>          |              | NBRC 100159 |
| #2704 | <i>Ustilago trichophora</i>          |              | NBRC 100160 |
| #2705 | <i>Ustilago cynodontis</i>           |              | NBRC 7530   |
| #2706 | <i>Ustilago cynodontis</i>           |              | NBRC 9727   |
| #2707 | <i>Ustilago cynodontis</i>           |              | NBRC 9758   |
| #2708 | <i>Ustilago rabenhorstiana</i>       |              | NBRC 8995   |
| #2710 | <i>Pseudozyma tsukubaensis</i>       |              | NBRC 1940   |
| #2813 | <i>Sporisorium lanigeri</i>          | BRIP 27609 a |             |
| #2814 | <i>Macalpinomyces mackinlayi</i>     | BRIP 52549 a |             |
| #2815 | <i>Sporisorium cenchri-elymoidis</i> | BRIP 26491 a |             |
| #2816 | <i>Macalpinomyces ordensis</i>       | BRIP 26904 a |             |
| #2817 | <i>Ustilago schmidiae</i>            | BRIP 26906 a |             |
| #2818 | <i>Sporisorium bothriochloae</i>     | BRIP 26908 a |             |
| #2819 | <i>Sporisorium themedae</i>          | BRIP 26917 a |             |
| #2820 | <i>Sporisorium tumiforme</i>         | BRIP 26919 a |             |
| #2821 | <i>Ustilago curta</i>                | BRIP 26929 a |             |
| #2822 | <i>Ustilago triodiae</i>             | BRIP 26907 a |             |

Queensland Plant  
Pathology Herbarium,  
Australia

|       |                                        |              |
|-------|----------------------------------------|--------------|
| #2823 | <i>Sporisorium setariae</i>            | BRIP 26910 a |
| #2824 | <i>Ustilago cynodontis</i>             | BRIP 28040 a |
| #2825 | <i>Sporisorium caledonicum</i>         | BRIP 28043 a |
| #2826 | <i>Ustilago lituana</i>                | BRIP 46795 a |
| #2832 | <i>Sporisorium iseilematis-ciliati</i> | BRIP 60429 a |
| #2833 | <i>Macalpinomyces spermophorus</i>     | BRIP 60430 a |
| #2834 | <i>Macalpinomyces tubiformis</i>       | BRIP 60434 a |
| #2835 | <i>Macalpinomyces spermophorus</i>     | BRIP 60448 a |
| #2836 | <i>Ustilago xerochloae</i>             | BRIP 60876 a |
| #2838 | <i>Sporisorium iseilematis-ciliati</i> | BRIP 60887 a |
| #2841 | <i>Anthracoystis heteropogonicola</i>  | BRIP 60896 a |
| #2842 | <i>Anthracoystis bothriochloae</i>     | BRIP 60901 a |
| #2850 | <i>Ustilago egenula</i>                | BRIP 60884 a |
| #3600 | <i>Ustilago maydis</i>                 |              |



Bernd Leuchtler [3]

---









**Table S5 Production parameters of biodiversity screening for acetate co-utilization.** Growth results of the five most promising strains obtained during experiments using the Growth Profiler device by EnzyScreen with different acetate concentrations as co-substrates in combination with 20 g L<sup>-1</sup> glucose (n=2). *U. maydis* #2135 and #2136 obtained best results using 10 g L<sup>-1</sup> acetate. Remaining strains showed highest growth using 2.5 g L<sup>-1</sup> acetate.

| Strain                   | C-source              | Max. OD <sub>600nm</sub> | Y <sub>OD/S</sub>                                  | Y <sub>OD/S</sub>                                      |
|--------------------------|-----------------------|--------------------------|----------------------------------------------------|--------------------------------------------------------|
|                          |                       | [-]                      | [max. OD <sub>600nm</sub> /g <sub>C-source</sub> ] | [max. OD <sub>600nm</sub> /C-mol <sub>C-source</sub> ] |
| <i>U. maydis</i>         | Glucose               | 46.8                     | 2.34                                               | 69.9                                                   |
|                          |                       | 48.3                     | 2.42                                               | 72.1                                                   |
| #1946                    | Glucose +<br>Acetate  | 55.9                     | 2.48                                               | 77.6                                                   |
|                          |                       | 56.5                     | 2.51                                               | 78.5                                                   |
| <i>U. cynodontis</i>     | Glucose               | 40.7                     | 2.03                                               | 60.7                                                   |
|                          |                       | 41.3                     | 2.07                                               | 61.7                                                   |
| #2707                    | Glucose +<br>Acetate  | 53.7                     | 2.38                                               | 74.5                                                   |
|                          |                       | 54.0                     | 2.40                                               | 75.0                                                   |
| <i>U. maydis</i>         | Glucose               | 29.9                     | 1.40                                               | 44.6                                                   |
|                          |                       | 19.9                     | 1.00                                               | 29.8                                                   |
| #2136                    | Glucose +<br>Acetate* | 51.4                     | 1.71                                               | 56.5                                                   |
|                          |                       | 52.8                     | 1.76                                               | 58.1                                                   |
| <i>U. maydis</i>         | Glucose               | 19.7                     | 0.99                                               | 29.4                                                   |
|                          |                       | 22.5                     | 1.13                                               | 33.6                                                   |
| #2135                    | Glucose +<br>Acetate* | 49.5                     | 1.65                                               | 54.4                                                   |
|                          |                       | 49.8                     | 1.66                                               | 54.8                                                   |
| <i>U. rabenhorstiana</i> | Glucose               | 38.0                     | 1.90                                               | 56.8                                                   |
|                          |                       | 38.2                     | 1.91                                               | 57.0                                                   |
| #2708                    | Glucose +<br>Acetate  | 48.3                     | 2.14                                               | 67.0                                                   |
|                          |                       | 50.0                     | 2.22                                               | 69.5                                                   |

**Table S6 Production parameters of biodiversity screening for formate co-utilization.** Growth results of the five most promising strains obtained during experiments using the Growth Profiler device by Enzyscreen with 2.5 g L<sup>-1</sup> formate as co-substrates in combination with 20 g L<sup>-1</sup> glucose (n=2).

| Strain                            | C-source          | Max.                    | Y <sub>OD/S</sub>                                  | Y <sub>OD/S</sub>                                      |
|-----------------------------------|-------------------|-------------------------|----------------------------------------------------|--------------------------------------------------------|
|                                   |                   | OD <sub>600nm</sub> [-] | [max. OD <sub>600nm</sub> /g <sub>C-source</sub> ] | [max. OD <sub>600nm</sub> /C-mol <sub>C-source</sub> ] |
| <i>U. rabenhorstiana</i><br>#2708 | Glucose           | 38.0                    | 1.90                                               | 56.8                                                   |
|                                   |                   | 38.2                    | 1.91                                               | 57.0                                                   |
|                                   | Glucose + Formate | 56.6                    | 2.52                                               | 80.9                                                   |
|                                   |                   | 56.7                    | 2.52                                               | 81.0                                                   |
| <i>U. cynodontis</i><br>#2707     | Glucose           | 31.6                    | 1.58                                               | 47.2                                                   |
|                                   |                   | 33.0                    | 1.65                                               | 49.3                                                   |
|                                   | Glucose + Formate | 50.0                    | 2.22                                               | 71.5                                                   |
|                                   |                   | 50.5                    | 2.25                                               | 72.2                                                   |
| <i>U. maydis</i><br>#2177         | Glucose           | 29.0                    | 1.45                                               | 43.3                                                   |
|                                   |                   | 30.2                    | 1.51                                               | 45.0                                                   |
|                                   | Glucose + Formate | 42.0                    | 1.86                                               | 59.9                                                   |
|                                   |                   | 43.1                    | 1.91                                               | 61.5                                                   |
| <i>U. cynodontis</i><br>#2706     | Glucose           | 27.5                    | 1.37                                               | 41.0                                                   |
|                                   |                   | 27.7                    | 1.38                                               | 41.3                                                   |
|                                   | Glucose + Formate | 40.4                    | 1.70                                               | 57.6                                                   |
|                                   |                   | 44.2                    | 1.93                                               | 63.1                                                   |
| <i>U. maydis</i><br>#2196         | Glucose           | 36.3                    | 1.82                                               | 54.2                                                   |
|                                   |                   | 37.8                    | 1.89                                               | 56.4                                                   |
|                                   | Glucose + Formate | 42.3                    | 1.88                                               | 60.4                                                   |
|                                   |                   | 43.4                    | 1.93                                               | 62.0                                                   |

**Table S7 Production parameters of System Duetz cultivation for acetate co-utilization.** System Duetz® 24-deep well plates cultivation experiments were performed with 1.5 ml MTM medium and 50 g L<sup>-1</sup> glucose. 6.25 g L<sup>-1</sup> acetate were added during co-culture cultivations. Error bars indicate the deviation from the mean for n=2.

| Strain                            | C-source          | Titer <sub>max</sub> | Y <sub>P/S</sub>                           | Y <sub>P/S</sub>                                   | Max. OD |
|-----------------------------------|-------------------|----------------------|--------------------------------------------|----------------------------------------------------|---------|
|                                   |                   | [g L <sup>-1</sup> ] | [g <sub>ITA</sub> /g <sub>c-source</sub> ] | [C-mol <sub>ITA</sub> /C-mol <sub>c-source</sub> ] | [-]     |
| <i>U. maydis</i><br>#2229         | Glucose           | 2.99                 | 0.060                                      | 0.069                                              | 39      |
|                                   |                   | 3.38                 | 0.068                                      | 0.078                                              | 33      |
|                                   | Glucose + Acetate | 7.20                 | 0.144                                      | 0.152                                              | 49      |
|                                   |                   | 7.60                 | 0.152                                      | 0.161                                              | 48      |
| <i>U. rabenhorstiana</i><br>#2708 | Glucose           | 4.30                 | 0.086                                      | 0.099                                              | 39      |
|                                   |                   | 4.31                 | 0.101                                      | 0.099                                              | 40      |
|                                   | Glucose + Acetate | 6.88                 | 0.136                                      | 0.144                                              | 41      |
|                                   |                   | 6.80                 | 0.138                                      | 0.145                                              | 45      |
| <i>U. cynodontis</i><br>#2707     | Glucose           | 2.24                 | 0.045                                      | 0.052                                              | 53      |
|                                   |                   | 2.05                 | 0.041                                      | 0.047                                              | 52      |
|                                   | Glucose + Acetate | 2.88                 | 0.056                                      | 0.060                                              | 50      |
|                                   |                   | 2.88                 | 0.058                                      | 0.061                                              | 53      |
| <i>U. maydis</i><br>#2135         | Glucose           | 2.40                 | 0.048                                      | 0.055                                              | 46      |
|                                   |                   | 2.42                 | 0.048                                      | 0.056                                              | 47      |
|                                   | Glucose + Acetate | 2.97                 | 0.071                                      | 0.075                                              | 54      |
|                                   |                   | 2.35                 | 0.059                                      | 0.063                                              | 58      |
| <i>U. maydis</i><br>#2136         | Glucose           | 2.36                 | 0.047                                      | 0.054                                              | 50      |
|                                   |                   | 2.28                 | 0.046                                      | 0.053                                              | 51      |
|                                   | Glucose + Acetate | 2.32                 | 0.046                                      | 0.049                                              | 49      |
|                                   |                   | 2.22                 | 0.044                                      | 0.047                                              | 50      |
| <i>U. maydis</i><br>#1946         | Glucose           | 0.09                 | 0.002                                      | 0.002                                              | 71      |
|                                   |                   | 0.06                 | 0.001                                      | 0.001                                              | 73      |
|                                   | Glucose + Acetate | 0.01                 | 0.000                                      | 0.00                                               | 72      |
|                                   |                   | 0.01                 | 0.000                                      | 0.00                                               | 66      |

**Table S8 Production parameters of System Duetz cultivation for formate co-utilization.** System Duetz® 24-deep well plates cultivation experiments were performed with 1.5 ml MTM medium and 50 g L<sup>-1</sup> glucose. 6.25 g L<sup>-1</sup> formate were added during co-culture cultivations. Error bars indicate the deviation from the mean for n=2.

| Strain                            | C-source          | Titer <sub>max.</sub> | Y <sub>P/S</sub>                           | Y <sub>P/S</sub>                                   | Max. OD |
|-----------------------------------|-------------------|-----------------------|--------------------------------------------|----------------------------------------------------|---------|
|                                   |                   | [g L <sup>-1</sup> ]  | [g <sub>ITA</sub> /g <sub>c-source</sub> ] | [C-mol <sub>ITA</sub> /C-mol <sub>c-source</sub> ] | [-]     |
| <i>U. cynodontis</i><br>#2706     | Glucose           | 6.64                  | 0.133                                      | 0.153                                              | 51      |
|                                   |                   | 6.90                  | 0.138                                      | 0.159                                              | 50      |
| <i>U. cynodontis</i><br>#2705     | Glucose + Formate | 6.90                  | 0.123                                      | 0.151                                              | 38      |
|                                   |                   | 5.81                  | 0.103                                      | 0.127                                              | 36      |
| <i>U. cynodontis</i><br>#2705     | Glucose           | 6.18                  | 0.124                                      | 0.143                                              | 52      |
|                                   |                   | 6.32                  | 0.126                                      | 0.146                                              | 57      |
| <i>U. rabenhorstiana</i><br>#2708 | Glucose + Formate | 9.04                  | 0.161                                      | 0.198                                              | 50      |
|                                   |                   | 8.20                  | 0.146                                      | 0.179                                              | 54      |
| <i>U. rabenhorstiana</i><br>#2708 | Glucose           | 4.16                  | 0.083                                      | 0.096                                              | 48      |
|                                   |                   | 4.35                  | 0.087                                      | 0.100                                              | 50      |
| <i>U. maydis</i><br>#2229         | Glucose + Formate | 3.98                  | 0.071                                      | 0.087                                              | 35      |
|                                   |                   | 2.64                  | 0.047                                      | 0.058                                              | 37      |
| <i>U. maydis</i><br>#2177         | Glucose           | 2.61                  | 0.052                                      | 0.060                                              | 50      |
|                                   |                   | 2.87                  | 0.057                                      | 0.066                                              | 54      |
| <i>U. maydis</i><br>#2177         | Glucose + Formate | 0.30                  | 0.005                                      | 0.007                                              | 37      |
|                                   |                   | 0.31                  | 0.004                                      | 0.007                                              | 36      |
| <i>U. maydis</i><br>#2196         | Glucose           | 2.78                  | 0.056                                      | 0.064                                              | 66      |
|                                   |                   | 2.60                  | 0.052                                      | 0.060                                              | 65      |
| <i>U. maydis</i><br>#2196         | Glucose + Formate | 0.43                  | 0.008                                      | 0.009                                              | 65      |
|                                   |                   | 0.49                  | 0.009                                      | 0.011                                              | 66      |
| <i>U. maydis</i><br>#2196         | Glucose           | 0.66                  | 0.013                                      | 0.015                                              | 79      |
|                                   |                   | 0.55                  | 0.011                                      | 0.013                                              | 80      |
| <i>U. maydis</i><br>#2196         | Glucose + Formate | 0.04                  | 0.001                                      | 0.001                                              | 60      |
|                                   |                   | 0.04                  | 0.001                                      | 0.001                                              | 57      |

**Table S9 pH values during System Duetz cultivation for acetate co-utilization.** System Duetz<sup>®</sup> 24-deep well plates cultivation experiments were performed with 1.5 ml MTM medium and 50 g L<sup>-1</sup> glucose. 6.25 g L<sup>-1</sup> acetate were added during co-culture cultivations. Error bars indicate the deviation from the mean for n=2.

| Strain                            | C-source          | Min. pH [-] | pH End [-] |
|-----------------------------------|-------------------|-------------|------------|
| <i>U. maydis</i><br>#2229         | Glucose           | 4.98        | 5.76       |
|                                   |                   | 4.96        | 5.80       |
|                                   | Glucose + Acetate | 5.49        | 5.78       |
|                                   |                   | 5.48        | 5.80       |
| <i>U. rabenhorstiana</i><br>#2708 | Glucose           | 2.51        | 2.86       |
|                                   |                   | 2.47        | 2.85       |
|                                   | Glucose + Acetate | 3.11        | 3.36       |
|                                   |                   | 3.13        | 3.37       |
| <i>U. cynodontis</i><br>#2707     | Glucose           | 3.37        | 3.44       |
|                                   |                   | 3.44        | 3.45       |
|                                   | Glucose + Acetate | 3.79        | 3.79       |
|                                   |                   | 3.78        | 3.78       |
| <i>U. maydis</i><br>#2135         | Glucose           | 4.64        | 5.68       |
|                                   |                   | 4.70        | 5.71       |
|                                   | Glucose + Acetate | 5.07        | 5.85       |
|                                   |                   | 5.09        | 5.80       |
| <i>U. maydis</i><br>#2136         | Glucose           | 5.02        | 5.72       |
|                                   |                   | 5.03        | 5.74       |
|                                   | Glucose + Acetate | 5.36        | 5.78       |
|                                   |                   | 5.38        | 5.79       |
| <i>U. maydis</i><br>#1946         | Glucose           | 5.61        | 5.63       |
|                                   |                   | 5.64        | 5.70       |
|                                   | Glucose + Acetate | 6.34        | 6.43       |
|                                   |                   | 6.32        | 6.42       |

**Table S10 pH values during System Duetz cultivation for formate co-utilization.** System Duetz® 24-deep well plates cultivation experiments were performed with 1.5 ml MTM medium and 50 g L<sup>-1</sup> glucose. 6.25 g L<sup>-1</sup> formate were added during co-culture cultivations. Error bars indicate the deviation from the mean for n=2.

| Strain                            | C-source          | Min. pH [-] | pH End [-] |
|-----------------------------------|-------------------|-------------|------------|
| <i>U. cynodontis</i><br>#2706     | Glucose           | 3.04        | 3.07       |
|                                   |                   | 3.03        | 3.01       |
|                                   | Glucose + Formate | 4.96        | 4.96       |
| <i>U. cynodontis</i><br>#2705     | Glucose           | 4.94        | 4.94       |
|                                   |                   | 2.86        | 2.86       |
|                                   | Glucose + Formate | 2.83        | 2.83       |
| <i>U. rabenhorstiana</i><br>#2708 | Glucose           | 4.26        | 4.26       |
|                                   |                   | 4.34        | 4.34       |
|                                   | Glucose + Formate | 3.80        | 3.95       |
| <i>U. maydis</i><br>#2229         | Glucose           | 3.76        | 3.84       |
|                                   |                   | 5.08        | 5.08       |
|                                   | Glucose + Formate | 5.11        | 5.11       |
| <i>U. maydis</i><br>#2177         | Glucose           | 4.85        | 5.87       |
|                                   |                   | 4.87        | 5.88       |
|                                   | Glucose + Formate | 5.54        | 6.05       |
| <i>U. maydis</i><br>#2196         | Glucose           | 5.56        | 6.06       |
|                                   |                   | 5.11        | 5.60       |
|                                   | Glucose + Formate | 5.10        | 5.56       |
| <i>U. maydis</i><br>#2196         | Glucose           | 5.64        | 6.57       |
|                                   |                   | 5.65        | 6.56       |
|                                   | Glucose + Formate | 6.71        | 7.80       |
| <i>U. maydis</i><br>#2196         | Glucose + Formate | 6.75        | 7.09       |
|                                   |                   | 6.66        | 7.69       |
|                                   |                   | 6.70        | 7.79       |

Table S11 Welch t-test results obtained for *U. maydis* #2229, *U. rabenhorstiana* #2708, and *U. cynodontis* #2705 during small-scale production and bioreactor experiments.

| t-Test: Two-Sample Assuming Unequal Variances |             |              | t-Test: Two-Sample Assuming Unequal Variances |             |              | t-Test: Two-Sample Assuming Unequal Variances |             |              |
|-----------------------------------------------|-------------|--------------|-----------------------------------------------|-------------|--------------|-----------------------------------------------|-------------|--------------|
| #2229 Maximum titer                           | small-scale |              | #2708 Maximum titer                           | small-scale |              | #2705 Maximum titer                           | small-scale |              |
|                                               | GLC         | co substrate |                                               | GLC         | co substrate |                                               | GLC         | co substrate |
| Mean                                          | 3.185       | 7.4          | Mean                                          | 4.305       | 6.84         | Mean                                          | 6.25        | 8.62         |
| Variance                                      | 0.07605     | 0.08         | Variance                                      | 5E-05       | 0.0032       | Variance                                      | 0.0098      | 0.3528       |
| Observations                                  | 2           | 2            | Observations                                  | 2           | 2            | Observations                                  | 2           | 2            |
| Hypothesized Mean Difference                  | 0           |              | Hypothesized Mean Difference                  | 0           |              | Hypothesized Mean Difference                  | 0           |              |
| df                                            | 2           |              | df                                            | 1           |              | df                                            | 1           |              |
| t Stat                                        | -15.089703  |              | t Stat                                        | -62.88561   |              | t Stat                                        | -5.56608    |              |
| P(T<=t) one-tail                              | 0.00218152  |              | P(T<=t) one-tail                              | 0.0050413   |              | P(T<=t) one-tail                              | 0.0565838   |              |
| t Critical one-tail                           | 2.91998558  |              | t Critical one-tail                           | 6.31375151  |              | t Critical one-tail                           | 6.31375151  |              |
| P(T<=t) two-tail                              | 0.00436304  |              | P(T<=t) two-tail                              | 0.0101226   |              | P(T<=t) two-tail                              | 0.1131676   |              |
| t Critical two-tail                           | 4.30265273  |              | t Critical two-tail                           | 12.7062047  |              | t Critical two-tail                           | 12.7062047  |              |

  

| t-Test: Two-Sample Assuming Unequal Variances |             |              | t-Test: Two-Sample Assuming Unequal Variances |             |              | t-Test: Two-Sample Assuming Unequal Variances |             |              |
|-----------------------------------------------|-------------|--------------|-----------------------------------------------|-------------|--------------|-----------------------------------------------|-------------|--------------|
| #2229 Yield                                   | small-scale |              | #2708 Yield                                   | small-scale |              | #2705 Yield                                   | small-scale |              |
|                                               | GLC         | co substrate |                                               | GLC         | co substrate |                                               | GLC         | co substrate |
| Mean                                          | 0.064       | 0.148        | Mean                                          | 0.0935      | 0.137        | Mean                                          | 0.125       | 0.1535       |
| Variance                                      | 3.2E-05     | 3.2E-05      | Variance                                      | 0.0001125   | 0.000002     | Variance                                      | 0.000002    | 0.0001125    |
| Observations                                  | 2           | 2            | Observations                                  | 2           | 2            | Observations                                  | 2           | 2            |
| Hypothesized Mean Difference                  | 0           |              | Hypothesized Mean Difference                  | 0           |              | Hypothesized Mean Difference                  | 0           |              |
| df                                            | 2           |              | df                                            | 1           |              | df                                            | 1           |              |
| t Stat                                        | -14.849242  |              | t Stat                                        | -5.7491218  |              | t Stat                                        | -3.766666   |              |
| P(T<=t) one-tail                              | 0.00225226  |              | P(T<=t) one-tail                              | 0.05481825  |              | P(T<=t) one-tail                              | 0.08260158  |              |
| t Critical one-tail                           | 2.91998558  |              | t Critical one-tail                           | 6.31375151  |              | t Critical one-tail                           | 6.31375151  |              |
| P(T<=t) two-tail                              | 0.00450453  |              | P(T<=t) two-tail                              | 0.10963649  |              | P(T<=t) two-tail                              | 0.16520315  |              |
| t Critical two-tail                           | 4.30265273  |              | t Critical two-tail                           | 12.7062047  |              | t Critical two-tail                           | 12.7062047  |              |

  

| t-Test: Two-Sample Assuming Unequal Variances |            |              | t-Test: Two-Sample Assuming Unequal Variances |            |              | t-Test: Two-Sample Assuming Unequal Variances |            |              |
|-----------------------------------------------|------------|--------------|-----------------------------------------------|------------|--------------|-----------------------------------------------|------------|--------------|
| #2229 Maximum titer                           | bioreactor |              | #2708 Maximum titer                           | bioreactor |              | #2705 Maximum titer                           | bioreactor |              |
|                                               | GLC        | co substrate |                                               | GLC        | co substrate |                                               | GLC        | co substrate |
| Mean                                          | 3.25       | 4.75         | Mean                                          | 2.1        | 2.9          | Mean                                          | 1.65       | 2.9          |
| Variance                                      | 0.005      | 0.045        | Variance                                      | 0          | 0.08         | Variance                                      | 0.005      | 0            |
| Observations                                  | 2          | 2            | Observations                                  | 2          | 2            | Observations                                  | 2          | 2            |
| Hypothesized Mean Difference                  | 0          |              | Hypothesized Mean Difference                  | 0          |              | Hypothesized Mean Difference                  | 0          |              |
| df                                            | 1          |              | df                                            | 1          |              | df                                            | 1          |              |
| t Stat                                        | -9.486833  |              | t Stat                                        | -4         |              | t Stat                                        | -25        |              |
| P(T<=t) one-tail                              | 0.03342936 |              | P(T<=t) one-tail                              | 0.07797913 |              | P(T<=t) one-tail                              | 0.01272561 |              |
| t Critical one-tail                           | 6.31375151 |              | t Critical one-tail                           | 6.31375151 |              | t Critical one-tail                           | 6.31375151 |              |
| P(T<=t) two-tail                              | 0.06685872 |              | P(T<=t) two-tail                              | 0.15595826 |              | P(T<=t) two-tail                              | 0.02545122 |              |
| t Critical two-tail                           | 12.7062047 |              | t Critical two-tail                           | 12.7062047 |              | t Critical two-tail                           | 12.7062047 |              |

  

| t-Test: Two-Sample Assuming Unequal Variances |            |              | t-Test: Two-Sample Assuming Unequal Variances |            |              | t-Test: Two-Sample Assuming Unequal Variances |            |              |
|-----------------------------------------------|------------|--------------|-----------------------------------------------|------------|--------------|-----------------------------------------------|------------|--------------|
| #2229 Yield                                   | bioreactor |              | #2708 Yield                                   | bioreactor |              | #2705 Yield                                   | bioreactor |              |
|                                               | GLC        | co substrate |                                               | GLC        | co substrate |                                               | GLC        | co substrate |
| Mean                                          | 0.07       | 0.085        | Mean                                          | 0.04       | 0.055        | Mean                                          | 0.033      | 0.052        |
| Variance                                      | 0          | 0.00005      | Variance                                      | 0          | 5E-05        | Variance                                      | 0.000002   | 3.9506E-07   |
| Observations                                  | 2          | 2            | Observations                                  | 2          | 2            | Observations                                  | 2          | 2            |
| Hypothesized Mean Difference                  | 0          |              | Hypothesized Mean Difference                  | 0          |              | Hypothesized Mean Difference                  | 0          |              |
| df                                            | 1          |              | df                                            | 1          |              | df                                            | 1          |              |
| t Stat                                        | -3         |              | t Stat                                        | -3         |              | t Stat                                        | -17.362419 |              |
| P(T<=t) one-tail                              | 0.10241638 |              | P(T<=t) one-tail                              | 0.10241638 |              | P(T<=t) one-tail                              | 0.01831304 |              |
| t Critical one-tail                           | 6.31375151 |              | t Critical one-tail                           | 6.31375151 |              | t Critical one-tail                           | 6.31375151 |              |
| P(T<=t) two-tail                              | 0.20483276 |              | P(T<=t) two-tail                              | 0.20483276 |              | P(T<=t) two-tail                              | 0.03662607 |              |
| t Critical two-tail                           | 12.7062047 |              | t Critical two-tail                           | 12.7062047 |              | t Critical two-tail                           | 12.7062047 |              |



**Table S12 Welch t-test results obtained during small-scale production experiments.** System Duetz<sup>®</sup> 24-deep well plates cultivation experiments were performed with 1.5 ml MTM medium and 50 g L<sup>-1</sup> glucose. 6.25 g L<sup>-1</sup> co-substrate were added during co-culture cultivations. Error bars indicate the deviation from the mean for n=2. Experiments performed with acetate are highlighted in yellow whereas formate cultivations are highlighted in grey.

| t-Test: Two-Sample Assuming Unequal Variances |            |              | t-Test: Two-Sample Assuming Unequal Variances |            |              | t-Test: Two-Sample Assuming Unequal Variances |            |              | t-Test: Two-Sample Assuming Unequal Variances |            |              |
|-----------------------------------------------|------------|--------------|-----------------------------------------------|------------|--------------|-----------------------------------------------|------------|--------------|-----------------------------------------------|------------|--------------|
| #2707 Maximum titer                           |            |              | #2135 Maximum titer                           |            |              | #2706 Maximum titer                           |            |              | #2229 Maximum titer                           |            |              |
|                                               | GLC        | co substrate |                                               | GLC        | co substrate |                                               | GLC        | co substrate |                                               | GLC        | co substrate |
| Mean                                          | 2.145      | 2.8845       | Mean                                          | 2.41       | 2.66         | Mean                                          | 6.77       | 6.355        | Mean                                          | 2.74       | 0.305        |
| Variance                                      | 0.01805    | 4.05E-05     | Variance                                      | 0.0002     | 0.1922       | Variance                                      | 0.0338     | 0.59405      | Variance                                      | 0.0338     | 5E-05        |
| Observations                                  | 2          | 2            | Observations                                  | 2          | 2            | Observations                                  | 2          | 2            | Observations                                  | 2          | 2            |
| Hypothesized Mean Difference                  | 0          |              | Hypothesized Mean Difference                  | 0          |              | Hypothesized Mean Difference                  | 0          |              | Hypothesized Mean Difference                  | 0          |              |
| df                                            | 1          |              | df                                            | 1          |              | df                                            | 1          |              | df                                            | 1          |              |
| t Stat                                        | -7.7754922 |              | t Stat                                        | -0.8060324 |              | t Stat                                        | 0.74068772 |              | t Stat                                        | 18.7169305 |              |
| P(T<=t) one-tail                              | 0.04071409 |              | P(T<=t) one-tail                              | 0.2840559  |              | P(T<=t) one-tail                              | 0.29707281 |              | P(T<=t) one-tail                              | 0.01699037 |              |
| t Critical one-tail                           | 6.31375151 |              | t Critical one-tail                           | 6.31375151 |              | t Critical one-tail                           | 6.31375151 |              | t Critical one-tail                           | 6.31375151 |              |
| P(T<=t) two-tail                              | 0.08142819 |              | P(T<=t) two-tail                              | 0.5681118  |              | P(T<=t) two-tail                              | 0.59414562 |              | P(T<=t) two-tail                              | 0.03398074 |              |
| t Critical two-tail                           | 12.7062047 |              | t Critical two-tail                           | 12.7062047 |              | t Critical two-tail                           | 12.7062047 |              | t Critical two-tail                           | 12.7062047 |              |
| t-Test: Two-Sample Assuming Unequal Variances |            |              | t-Test: Two-Sample Assuming Unequal Variances |            |              | t-Test: Two-Sample Assuming Unequal Variances |            |              | t-Test: Two-Sample Assuming Unequal Variances |            |              |
| #2707 Yield                                   |            |              | #2135 Yield                                   |            |              | #2706 Yield                                   |            |              | #2229 Yield                                   |            |              |
|                                               | GLC        | co substrate |                                               | GLC        | co substrate |                                               | GLC        | co substrate |                                               | GLC        | co substrate |
| Mean                                          | 0.043      | 0.057        | Mean                                          | 0.0485     | 0.065        | Mean                                          | 0.1305     | 0.113        | Mean                                          | 0.0545     | 0.0045       |
| Variance                                      | 8E-06      | 0.000002     | Variance                                      | 5E-07      | 0.000072     | Variance                                      | 0.0000125  | 0.0002       | Variance                                      | 0.0000125  | 0.000005     |
| Observations                                  | 2          | 2            | Observations                                  | 2          | 2            | Observations                                  | 2          | 2            | Observations                                  | 2          | 2            |
| Hypothesized Mean Difference                  | 0          |              | Hypothesized Mean Difference                  | 0          |              | Hypothesized Mean Difference                  | 0          |              | Hypothesized Mean Difference                  | 0          |              |
| df                                            | 1          |              | df                                            | 1          |              | df                                            | 1          |              | df                                            | 1          |              |
| t Stat                                        | -6.2609903 |              | t Stat                                        | -2.7405008 |              | t Stat                                        | 1.69774938 |              | t Stat                                        | 19.6116135 |              |
| P(T<=t) one-tail                              | 0.05041437 |              | P(T<=t) one-tail                              | 0.11137147 |              | P(T<=t) one-tail                              | 0.16943737 |              | P(T<=t) one-tail                              | 0.01621664 |              |
| t Critical one-tail                           | 6.31375151 |              | t Critical one-tail                           | 6.31375151 |              | t Critical one-tail                           | 6.31375151 |              | t Critical one-tail                           | 6.31375151 |              |
| P(T<=t) two-tail                              | 0.10082873 |              | P(T<=t) two-tail                              | 0.22274294 |              | P(T<=t) two-tail                              | 0.33897474 |              | P(T<=t) two-tail                              | 0.03243328 |              |
| t Critical two-tail                           | 12.7062047 |              | t Critical two-tail                           | 12.7062047 |              | t Critical two-tail                           | 12.7062047 |              | t Critical two-tail                           | 12.7062047 |              |
| t-Test: Two-Sample Assuming Unequal Variances |            |              | t-Test: Two-Sample Assuming Unequal Variances |            |              | t-Test: Two-Sample Assuming Unequal Variances |            |              | t-Test: Two-Sample Assuming Unequal Variances |            |              |
| #2136 Maximum titer                           |            |              | #1946 Maximum titer                           |            |              | #2177 Maximum Titer                           |            |              | #2196 Maximum Titer                           |            |              |
|                                               | GLC        | co substrate |                                               | GLC        | co substrate |                                               | GLC        | co substrate |                                               | GLC        | co substrate |
| Mean                                          | 2.32       | 2.27         | Mean                                          | 0.075      | 0.011        | Mean                                          | 2.69       | 0.46         | Mean                                          | 0.605      | 0.0405       |
| Variance                                      | 0.0032     | 0.005        | Variance                                      | 0.00045    | 0.000002     | Variance                                      | 0.0162     | 0.0018       | Variance                                      | 0.00605    | 5E-07        |
| Observations                                  | 2          | 2            | Observations                                  | 2          | 2            | Observations                                  | 2          | 2            | Observations                                  | 2          | 2            |
| Hypothesized Mean Difference                  | 0          |              | Hypothesized Mean Difference                  | 0          |              | Hypothesized Mean Difference                  | 0          |              | Hypothesized Mean Difference                  | 0          |              |
| df                                            | 2          |              | df                                            | 1          |              | df                                            | 1          |              | df                                            | 1          |              |
| t Stat                                        | 0.78086881 |              | t Stat                                        | 4.25721667 |              | t Stat                                        | 23.5062639 |              | t Stat                                        | 10.2632123 |              |
| P(T<=t) one-tail                              | 0.25831588 |              | P(T<=t) one-tail                              | 0.07343813 |              | P(T<=t) one-tail                              | 0.01353333 |              | P(T<=t) one-tail                              | 0.03091705 |              |
| t Critical one-tail                           | 2.91998558 |              | t Critical one-tail                           | 6.31375151 |              | t Critical one-tail                           | 6.31375151 |              | t Critical one-tail                           | 6.31375151 |              |
| P(T<=t) two-tail                              | 0.51663176 |              | P(T<=t) two-tail                              | 0.14687626 |              | P(T<=t) two-tail                              | 0.02706666 |              | P(T<=t) two-tail                              | 0.06183411 |              |
| t Critical two-tail                           | 4.30265273 |              | t Critical two-tail                           | 12.7062047 |              | t Critical two-tail                           | 12.7062047 |              | t Critical two-tail                           | 12.7062047 |              |
| t-Test: Two-Sample Assuming Unequal Variances |            |              | t-Test: Two-Sample Assuming Unequal Variances |            |              | t-Test: Two-Sample Assuming Unequal Variances |            |              | t-Test: Two-Sample Assuming Unequal Variances |            |              |
| #2136 Yield                                   |            |              | #21946 Yield                                  |            |              | #2177 Yield                                   |            |              | #2196 Yield                                   |            |              |
|                                               | GLC        | co substrate |                                               | GLC        | co substrate |                                               | GLC        | co substrate |                                               | GLC        | co substrate |
| Mean                                          | 0.0465     | 0.045        | Mean                                          | 0.0015     | 0            | Mean                                          | 0.054      | 0.0085       | Mean                                          | 0.012      | 0.001        |
| Variance                                      | 5E-07      | 0.000002     | Variance                                      | 0.0000005  | 0            | Variance                                      | 8E-06      | 5E-07        | Variance                                      | 0.000002   | 0            |
| Observations                                  | 2          | 2            | Observations                                  | 2          | 2            | Observations                                  | 2          | 2            | Observations                                  | 2          | 2            |
| Hypothesized Mean Difference                  | 0          |              | Hypothesized Mean Difference                  | 0          |              | Hypothesized Mean Difference                  | 0          |              | Hypothesized Mean Difference                  | 0          |              |
| df                                            | 1          |              | df                                            | 1          |              | df                                            | 1          |              | df                                            | 1          |              |
| t Stat                                        | 1.34164079 |              | t Stat                                        | 3          |              | t Stat                                        | 22.0707419 |              | t Stat                                        | 11         |              |
| P(T<=t) one-tail                              | 0.20388458 |              | P(T<=t) one-tail                              | 0.10241638 |              | P(T<=t) one-tail                              | 0.0144124  |              | P(T<=t) one-tail                              | 0.02885794 |              |
| t Critical one-tail                           | 6.31375151 |              | t Critical one-tail                           | 6.31375151 |              | t Critical one-tail                           | 6.31375151 |              | t Critical one-tail                           | 6.31375151 |              |
| P(T<=t) two-tail                              | 0.40776917 |              | P(T<=t) two-tail                              | 0.20483276 |              | P(T<=t) two-tail                              | 0.0288248  |              | P(T<=t) two-tail                              | 0.05771588 |              |
| t Critical two-tail                           | 12.7062047 |              | t Critical two-tail                           | 12.7062047 |              | t Critical two-tail                           | 12.7062047 |              | t Critical two-tail                           | 12.7062047 |              |

### Supplementary references

1. Djoumbou-Feunang, Y.; Pon, A.; Karu, N.; Zheng, J.; Li, C.; Arndt, D.; Gautam, M.; Allen, F.; Wishart, D. Significantly Improved ESI-MS/MS Prediction and Compound Identification. *Metabolites*. **2019** 9(4), 72.
2. Kellner, R.; Der Einfluss sexueller Reproduktion und Virulenz auf die Evolution und Speziation der biotrophen Brandpilzfamilie Ustilaginaceae. Dissertation. Germany: Ruhr-Universität Bochum. **2011**.
3. Leuchte, B.; Microbial contamination of domestic heating oil : reasons and effects on fuel and tank. Dissertation. Germany: RWTH Aachen University. **2015**
